# Supplementary material for: Eganelisib combined with immune checkpoint inhibitor therapy and chemotherapy in frontline metastatic triple-negative breast cancer triggers macrophage reprogramming, immune activation and extracellular matrix reorganization in the tumor microenvironment
Source: PubMed Central journal article supplement — J Immunother Cancer. 2024 Aug 30;12(8):e009160. doi: 10.1136/jitc-2024-009160 (PMC11367338; doi:10.1136/jitc-2024-009160), 2024-08-30
Supplement: jitc-12-8-s001.pdf [file jitc-12-8-s001.pdf]

## **List of Supplemental Materials**

Supplemental Methods – Multiplex Chemokine/Cytokine and Flow Cytometry

Supplemental Figure 1. Peripheral Blood analysis for Cytokines and Immune Cell Subsets from MARIO-1 solid tumor monotherapy

Supplemental Figure 2. Individual Patient Analysis of Adaptive Immune System Pathway Genes within Leukocytes

Supplemental Figure 3. PD-L1 Immunohistochemistry in paired tumor biopsies

Supplemental Table 1. Individual Patient Clinical Data

Supplemental Table 2. Top Differentially Expressed Genes Post Treatment within CD45+ Enriched Region

Supplemental Table 3. Individual Patient Pathway Analysis Post Treatment within CD45+ Enriched Region

Supplemental Table 4. Top Differentially Expressed Genes Post Treatment within CD45+ Enriched Region Grouped by Baseline PD-L1 Status

Supplemental Table 5. Differential Gene Expression at Baseline within CD45+ Enriched Region Grouped by Baseline PD-L1 Status

Supplemental Table 6. Top Differentially Expressed Genes Post Treatment within CD68+ Enriched Region

Supplemental Table 7. Individual Patient Pathway Analysis Post Treatment within CD68+ Enriched Region

Supplemental Table 8. Individual Patient Analysis of Interferon Gamma Signaling Pathway Genes Post Treatment within CD68+ Enriched Region

## **Supplemental Methods**

Multiplex Chemokine/Cytokine

Multiplex protein analysis was performed by the multiplex core facility at The Forsyth Institute (Cambridge, MA, USA). Samples were thawed at 4°C prior to assay and kept on ice throughout the assay procedures. Manufacturers' protocols were followed for all panels, with a general

protocol as follows. Assay plates (96-well) were loaded with assay buffer, standards, samples and beads and then covered and incubated on plate shaker (500 rpm) overnight at 4°C. After primary incubation, plates were washed twice and then detection antibody cocktail was added to all wells and incubated at room temperature for 1 hour on plate shaker. Next, streptavidin-phycoerythrin fluorescent reporter was added to all wells and incubated for 30 minutes at room temperature on plate shaker. Plates were washed twice, beads were resuspended in sheath fluid, placed on shaker for 5 minutes and then read on Bio-PlexR200 following manufacturers' specifications using Bio- Plex Manager software v 6.0. Values  $\leq$  the lower limit of quantification (LLOQ) were set to the LLOQ for inclusion in the analysis. Changes in the concentration of cytokines in response to treatment were determined using One-Way Repeated Measures ANOVAs and Sidak *post hoc* contrasts . P-values were adjusted using Bonferroni corrections for multiple comparisons.

## Flow Cytometry

Flow cytometry analysis was performed by Cell Carta (Fremont, CA, USA) on whole blood samples collected in Streck Cyto-Chex™ tubes shipped and stored at room temperature. Myeloid cell analysis was performed on fresh samples processed within 4 days of sample collection and T-Cell analysis was performed on batched samples that were previously fixed (BD Phosflow lyse/fix) and frozen at -80°C. Cells were processed and stained using a cocktail of fluorescent-labeled antibodies with a myeloid panel; (CD45 V500 (BD Biosciences catalog#624327), CD14 Pacific Blue (Biolegend catalog#325616), HLA-DR APC (Biolegend catalog#307610), CD15 Alexa700 (Biolegend 323026), CD66b PerCP-Cy5 (Biolegend 305108), CD11b PE-Cy7 (Biolegend 301322), CD33 PE (Biolegend 366608) and T-cell panel; (CD45 BUV805 (BD Biosciences catalog#612891), CD3 PE-Cy7 (Biolegend, 300420), CD4 BV480 (BD

Biosciences catalog#566104) , CD8 BV785 (Biolegend catalog#301046), CD45RA BUV395 (BD Biosciences catalog#624308), PD1 PE\_Dazzle594 (Biolegend catalog#329940), CTLA-4 APC (Biolegend catalog#369612), and Ki67 Ax488 (BD Biosciences catalog#561165)), run on a flow cytometer (BD LSRII) and analyzed using Cell Engine software (CellCarta Montreal Canada). Cell populations were quantified as absolute cell counts or percent of parent.

Monocytic MDSC's (mMDSC) and monocytes were defined as HLA-DR-

CD14+CD45+CD11b+CD33+CD66b- CD15-and HLA-

DR+CD14+CD45+CD11b+CD33+CD66b-CD15-, respectively. One-Way Repeated Measures

ANOVAs and Sidak's *post hoc* contrasts were used to characterize changes in cell populations with treatment.

### **Supplemental Figures**

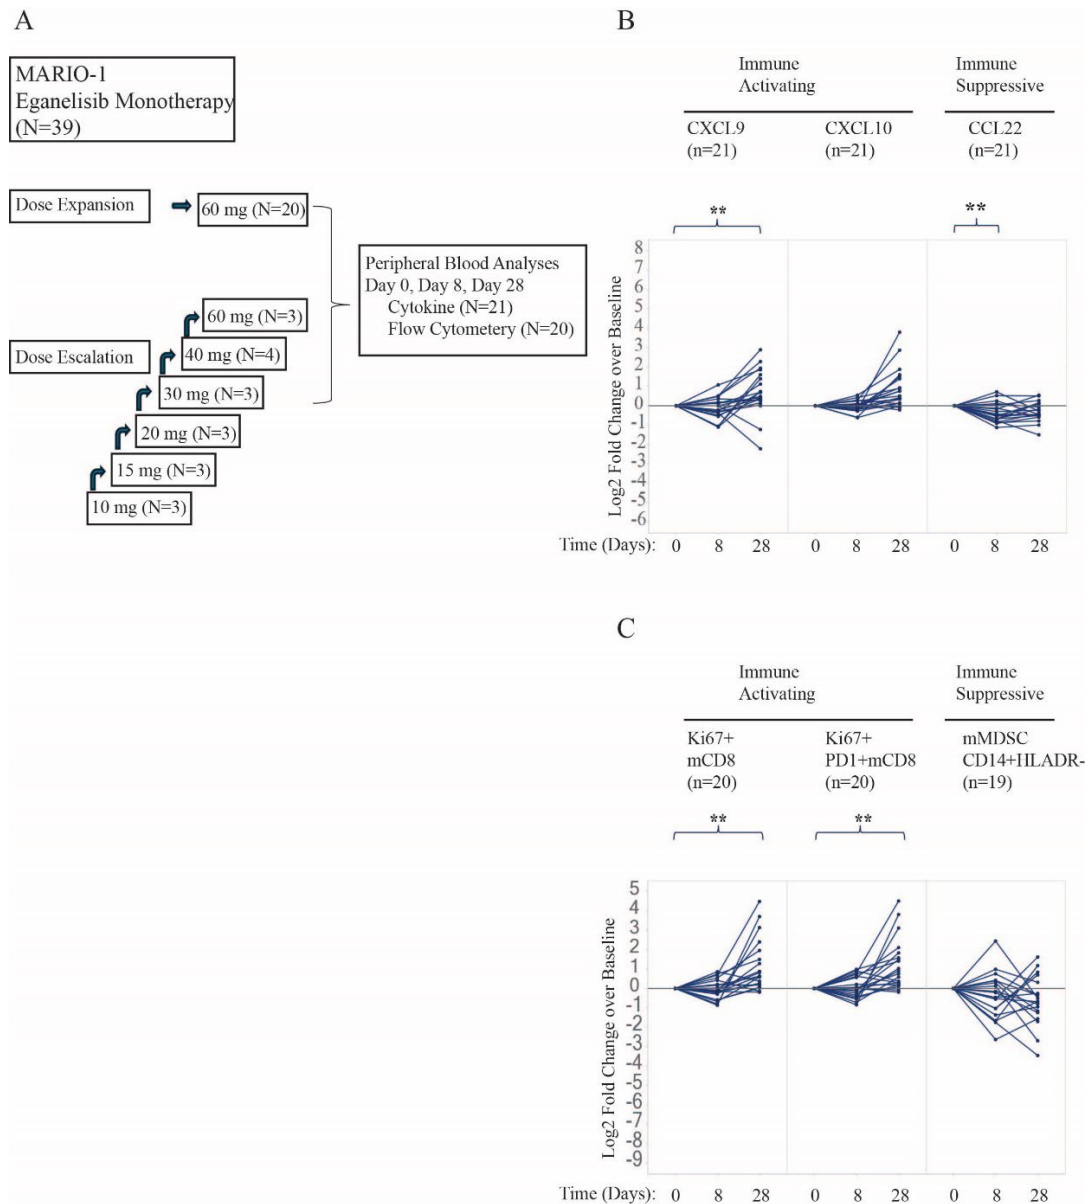

**Supplemental Figure 1.** Peripheral Blood analysis for Cytokines and Immune Cell Subsets from MARIO-1 solid tumor monotherapy. The flow chart shows the number of patients in each cohort of the study and the number of patients included in the analyses (A). Patients with a full set of Day 0, Day 8, and Day 28 samples are included in the analyses. Concentrations of cytokines were measured by Luminex and expressed as log<sub>2</sub> fold change over baseline for indicated timepoints (B). Absolute cell counts for monocytic MDSCs (HLADR-CD14+CD11b+CD33+),

proliferation of memory CD8 T-Cells (Ki67+ of CD45RA-CD8+), and proliferation of exhausted memory CD8 T-Cells (Ki67+ of PD1+CD45RA-CD8+ T-Cells) were measured by flow cytometry and expressed as log2fold change over baseline for indicated timepoints (C) One-way repeated measures ANOVA was performed to determine changes in cytokines and immune cell populations with treatment. For cytokine analysis, p-values were adjusted using Bonferonni correction for multiple comparisons \*p<.05, \*\*p<.01

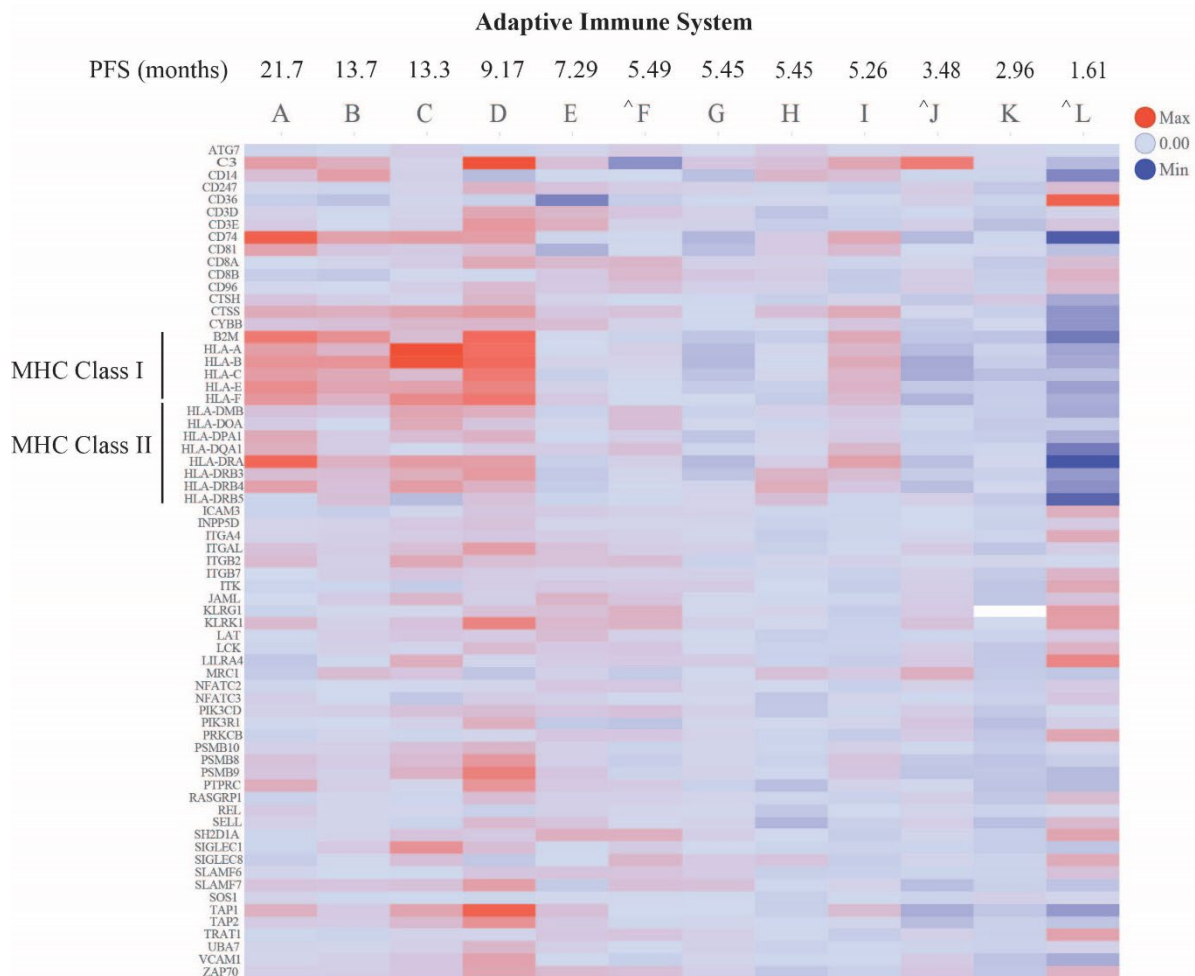

**Supplemental Figure 2.** Individual Patient Analysis of Adaptive Immune System Pathway Genes within Leukocytes. Changes in gene expression for genes contributing to the core enrichment of the adaptive immune system identified in the group analysis (n=12) within CD45+



|   |       |     |     |                  |           |           |        | prior to OT Biopsy |
|---|-------|-----|-----|------------------|-----------|-----------|--------|--------------------|
| A | 21.7+ | POS | POS | -                | -         | -         | Day 65 |                    |
| B | 13.7+ | NEG | NEG | -                | -         | -         | Day 52 |                    |
| C | 13.3  | NEG | POS | -                | -         | -         | Day 49 |                    |
| D | 9.17+ | NEG | POS | -                | -         | -         | Day 63 |                    |
| E | 7.29  | NEG | POS | -                | -         | -         | Day 70 |                    |
| F | 5.49  | POS | POS | Day 12-35, 39-56 | Day 14-28 | Day 14-28 | Day 59 | Eganelisib Only    |
| G | 5.45  | NEG | POS | Day 15-28        | Day 15-28 | Day 15-28 | Day 54 |                    |
| H | 5.45  | NEG | NEG | Day 42-56        | Day 42-56 | -         | Day 56 | Eganelisib +Atezo  |
| I | 5.26  | POS | POS | Day 54-63        | Day 56-63 | Day 56-63 | Day 78 |                    |
| J | 3.48  | POS | UNK | Day 28-50        | -         | -         | Day 50 | Eganelisib Only    |
| K | 2.96  | NEG | NEG | -                | -         | -         | Day 54 |                    |
| L | 1.61  | NEG | NEG | Day 28-69        | -         | Day 28-34 | Day 69 | Eganelisib Only    |

\*Datacut April 14, 2023, + PFS ongoing at datacut, OT on-treatment

Supplemental Table 2. Top Differentially Expressed Genes Post Treatment within CD45+ Enriched Region

| Top 50 Up-regulated genes (CD45+ Region) |         |        |            |
|------------------------------------------|---------|--------|------------|
| measure                                  | p.value | log2FC | n_patients |
| CXCL9                                    | 7.5E-07 | 0.99   | 12         |
| C3                                       | 3.8E-07 | 0.85   | 12         |
| CCL5                                     | 5.1E-07 | 0.60   | 12         |
| CLU                                      | 1.7E-03 | 0.55   | 12         |
| HLA-B                                    | 6.5E-06 | 0.55   | 12         |
| KLRK1                                    | 2.2E-09 | 0.53   | 12         |
| STAT1                                    | 3.9E-05 | 0.50   | 12         |
| SERPINA1                                 | 1.1E-02 | 0.50   | 11         |
| TRBC1/2                                  | 6.6E-04 | 0.49   | 12         |
| CTSS                                     | 1.1E-02 | 0.45   | 12         |
| HLA-F                                    | 4.7E-06 | 0.45   | 12         |
| HLA-A                                    | 8.7E-04 | 0.43   | 12         |
| CCL19                                    | 2.1E-04 | 0.40   | 12         |
| NKG7                                     | 2.7E-07 | 0.40   | 12         |
| B2M                                      | 2.6E-03 | 0.39   | 12         |
| HLA-E                                    | 4.7E-05 | 0.38   | 12         |
| IL2RB                                    | 1.1E-06 | 0.38   | 12         |
| HLA-C                                    | 1.7E-03 | 0.38   | 12         |
| TRAC                                     | 5.0E-03 | 0.37   | 12         |
| GZMA                                     | 1.7E-06 | 0.37   | 12         |
| ITGAL                                    | 2.3E-06 | 0.35   | 12         |
| IL32                                     | 1.4E-03 | 0.33   | 12         |
| GIMAP4                                   | 8.2E-06 | 0.32   | 12         |
| A2M                                      | 2.1E-02 | 0.31   | 12         |
| SERPING1                                 | 5.2E-03 | 0.31   | 12         |
| ZAP70                                    | 2.2E-04 | 0.30   | 12         |

| Top 50 Down-regulated genes (CD45+ Region) |         |        |            |
|--------------------------------------------|---------|--------|------------|
| measure                                    | p.value | log2FC | n_patients |
| FN1                                        | 6.9E-04 | -0.65  | 12         |
| COL5A1                                     | 5.6E-05 | -0.60  | 12         |
| TPM1                                       | 4.8E-07 | -0.60  | 12         |
| CALML5                                     | 5.9E-06 | -0.52  | 11         |
| SPP1                                       | 1.2E-02 | -0.52  | 12         |
| COL11A1                                    | 3.7E-06 | -0.47  | 12         |
| THBS1                                      | 8.3E-05 | -0.46  | 12         |
| COL5A2                                     | 1.2E-03 | -0.45  | 12         |
| IER3                                       | 8.1E-07 | -0.41  | 12         |
| MMP1                                       | 4.2E-06 | -0.40  | 12         |
| ACTA2                                      | 2.1E-04 | -0.40  | 12         |
| PLAUR                                      | 3.9E-06 | -0.38  | 12         |
| MCAM                                       | 2.1E-08 | -0.38  | 12         |
| MMP9                                       | 4.4E-02 | -0.37  | 12         |
| INHBA                                      | 2.8E-06 | -0.32  | 12         |
| FLNB                                       | 5.4E-06 | -0.32  | 12         |
| OLFML2B                                    | 5.8E-07 | -0.32  | 12         |
| VCAN                                       | 1.1E-02 | -0.31  | 12         |
| NOTCH3                                     | 2.6E-05 | -0.30  | 12         |
| FLNA                                       | 1.8E-03 | -0.29  | 12         |
| DSC3                                       | 1.6E-04 | -0.29  | 12         |
| ANLN                                       | 1.1E-06 | -0.29  | 12         |
| HEY1                                       | 3.4E-03 | -0.16  | 12         |
| SPRED1                                     | 1.5E-02 | -0.16  | 12         |
| DDIT4                                      | 2.5E-02 | -0.16  | 12         |
| EIF4EBP1                                   | 1.3E-03 | -0.16  | 12         |

|              |         |      |    |
|--------------|---------|------|----|
| CTSW         | 7.9E-06 | 0.30 | 12 |
| IL7R         | 1.3E-02 | 0.30 | 12 |
| CD8A         | 5.5E-05 | 0.30 | 12 |
| GZMK         | 2.8E-05 | 0.29 | 12 |
| NLRC5        | 1.2E-05 | 0.29 | 12 |
| TRDC         | 1.2E-05 | 0.28 | 12 |
| PTPRC        | 1.5E-03 | 0.28 | 12 |
| GBP1         | 4.2E-04 | 0.28 | 12 |
| TARP/TRGC1/2 | 6.6E-05 | 0.27 | 12 |
| CD2          | 2.3E-03 | 0.27 | 12 |
| SSX1         | 2.3E-02 | 0.27 | 12 |
| IL2RG        | 2.4E-04 | 0.26 | 12 |
| JAML         | 1.6E-05 | 0.26 | 12 |
| SH2D1A       | 3.1E-05 | 0.26 | 12 |
| CXCL13       | 6.9E-03 | 0.25 | 12 |
| CD37         | 9.3E-04 | 0.25 | 12 |
| CXCL11       | 4.7E-04 | 0.25 | 12 |
| ITGB2        | 2.5E-02 | 0.25 | 12 |
| ADGRE5       | 3.3E-06 | 0.24 | 12 |
| CD3E         | 2.6E-03 | 0.24 | 12 |
| PIK3CD       | 4.5E-05 | 0.24 | 12 |
| XCL1/2       | 1.8E-05 | 0.24 | 12 |
| LCP1         | 2.1E-02 | 0.24 | 12 |
| SELL         | 7.9E-04 | 0.24 | 11 |

|         |         |       |    |
|---------|---------|-------|----|
| CACNG4  | 1.8E-02 | -0.16 | 9  |
| FOS     | 3.4E-02 | -0.15 | 12 |
| MAP3K8  | 6.0E-04 | -0.15 | 12 |
| CXCL8   | 3.9E-02 | -0.15 | 12 |
| MFGE8   | 2.2E-02 | -0.15 | 11 |
| SOCS3   | 1.2E-02 | -0.15 | 12 |
| PLOD2   | 1.1E-02 | -0.15 | 12 |
| AKAP1   | 1.2E-02 | -0.15 | 12 |
| BCAT1   | 2.5E-02 | -0.15 | 12 |
| CACNB3  | 1.2E-02 | -0.15 | 12 |
| TCF7L1  | 5.7E-03 | -0.15 | 12 |
| IRAK1   | 1.6E-03 | -0.15 | 12 |
| SLC39A6 | 1.9E-03 | -0.14 | 12 |
| FGFR1   | 2.7E-02 | -0.14 | 12 |
| PBX1    | 8.5E-03 | -0.14 | 12 |
| RUNX1   | 4.5E-03 | -0.14 | 12 |
| MAPK9   | 1.2E-03 | -0.14 | 12 |
| ITPK1   | 2.9E-02 | -0.14 | 12 |
| CD276   | 1.6E-02 | -0.14 | 12 |
| FGFR3   | 1.1E-02 | -0.14 | 9  |
| DUSP6   | 9.8E-03 | -0.14 | 12 |
| FOSL1   | 8.1E-03 | -0.14 | 12 |
| ETV1    | 3.8E-03 | -0.14 | 12 |
| CXADR   | 1.6E-02 | -0.14 | 12 |

Supplemental Table 3. Individual Patient Pathway Analysis Post Treatment within CD45+ Enriched Region

| Patient ID | Reactome Pathway ID | Description                | NES   | pvalue   |
|------------|---------------------|----------------------------|-------|----------|
| A          | R-HSA-1280218       | Adaptive Immune System     | 2.06  | 4.24E-08 |
| B          | R-HSA-1280218       | Adaptive Immune System     | 1.72  | 6.43E-05 |
| C          | R-HSA-1280218       | Adaptive Immune System     | 2.04  | 1.09E-08 |
| D          | R-HSA-1280218       | Adaptive Immune System     | 2.11  | 2.16E-09 |
| E          | R-HSA-1280218       | Adaptive Immune System     | 1.11  | 2.56E-01 |
| F          | R-HSA-1280218       | Adaptive Immune System     | 1.40  | 6.92E-03 |
| G          | R-HSA-1280218       | Adaptive Immune System     | -1.47 | 6.71E-03 |
| H          | R-HSA-1280218       | Adaptive Immune System     | -1.26 | 5.90E-03 |
| I          | R-HSA-1280218       | Adaptive Immune System     | 1.41  | 1.81E-02 |
| J          | R-HSA-1280218       | Adaptive Immune System     | -1.28 | 3.94E-02 |
| K          | R-HSA-1280218       | Adaptive Immune System     | -1.01 | 4.68E-01 |
| L          | R-HSA-1280218       | Adaptive Immune System     | -1.69 | 6.17E-05 |
| A          | R-HSA-877300        | Interferon gamma signaling | 2.46  | 8.84E-09 |
| B          | R-HSA-877300        | Interferon gamma signaling | 1.89  | 3.00E-04 |
| C          | R-HSA-877300        | Interferon gamma signaling | 2.63  | 2.42E-10 |
| D          | R-HSA-877300        | Interferon gamma signaling | 2.62  | 1.42E-10 |
| E          | R-HSA-877300        | Interferon gamma signaling | 1.13  | 2.82E-01 |
| F          | R-HSA-877300        | Interferon gamma signaling | 0.69  | 9.41E-01 |



|   |               |                                                        |       |          |
|---|---------------|--------------------------------------------------------|-------|----------|
| G | R-HSA-877300  | Interferon gamma signaling                             | -1.26 | 1.93E-01 |
| H | R-HSA-877300  | Interferon gamma signaling                             | 0.80  | 7.91E-01 |
| I | R-HSA-877300  | Interferon gamma signaling                             | 2.10  | 2.45E-05 |
| J | R-HSA-877300  | Interferon gamma signaling                             | -1.88 | 5.92E-04 |
| K | R-HSA-877300  | Interferon gamma signaling                             | -1.68 | 7.93E-03 |
| L | R-HSA-877300  | Interferon gamma signaling                             | -2.93 | 4.31E-11 |
| A | R-HSA-913531  | Interferon Signaling                                   | 2.36  | 3.19E-08 |
| B | R-HSA-913531  | Interferon Signaling                                   | 1.86  | 2.68E-04 |
| C | R-HSA-913531  | Interferon Signaling                                   | 2.36  | 3.06E-08 |
| D | R-HSA-913531  | Interferon Signaling                                   | 2.85  | 1.94E-16 |
| E | R-HSA-913531  | Interferon Signaling                                   | 1.02  | 4.17E-01 |
| F | R-HSA-913531  | Interferon Signaling                                   | -1.21 | 1.90E-01 |
| G | R-HSA-913531  | Interferon Signaling                                   | -1.37 | 9.29E-02 |
| H | R-HSA-913531  | Interferon Signaling                                   | -1.58 | 1.57E-03 |
| I | R-HSA-913531  | Interferon Signaling                                   | 1.90  | 3.16E-04 |
| J | R-HSA-913531  | Interferon Signaling                                   | -2.40 | 2.14E-09 |
| K | R-HSA-913531  | Interferon Signaling                                   | -1.64 | 3.60E-03 |
| L | R-HSA-913531  | Interferon Signaling                                   | -3.04 | 1.80E-14 |
| A | R-HSA-983169  | Class I MHC mediated antigen processing & presentation | 2.16  | 5.86E-06 |
| B | R-HSA-983169  | Class I MHC mediated antigen processing & presentation | 1.92  | 3.98E-05 |
| C | R-HSA-983169  | Class I MHC mediated antigen processing & presentation | 2.11  | 3.70E-06 |
| D | R-HSA-983169  | Class I MHC mediated antigen processing & presentation | 1.90  | 2.36E-04 |
| E | R-HSA-983169  | Class I MHC mediated antigen processing & presentation | -0.83 | 7.76E-01 |
| F | R-HSA-983169  | Class I MHC mediated antigen processing & presentation | -0.96 | 5.36E-01 |
| G | R-HSA-983169  | Class I MHC mediated antigen processing & presentation | -1.51 | 4.45E-02 |
| H | R-HSA-983169  | Class I MHC mediated antigen processing & presentation | -0.69 | 9.41E-01 |
| I | R-HSA-983169  | Class I MHC mediated antigen processing & presentation | 2.25  | 2.84E-07 |
| J | R-HSA-983169  | Class I MHC mediated antigen processing & presentation | -1.96 | 3.48E-05 |
| K | R-HSA-983169  | Class I MHC mediated antigen processing & presentation | -1.09 | 3.28E-01 |
| L | R-HSA-983169  | Class I MHC mediated antigen processing & presentation | -1.65 | 5.94E-03 |
| A | R-HSA-2132295 | MHC class II antigen presentation                      | 2.22  | 2.25E-06 |
| B | R-HSA-2132295 | MHC class II antigen presentation                      | 1.89  | 8.55E-04 |
| C | R-HSA-2132295 | MHC class II antigen presentation                      | 2.06  | 9.67E-05 |
| D | R-HSA-2132295 | MHC class II antigen presentation                      | 1.71  | 5.25E-03 |
| E | R-HSA-2132295 | MHC class II antigen presentation                      | -1.01 | 4.43E-01 |
| F | R-HSA-2132295 | MHC class II antigen presentation                      | 1.28  | 1.51E-01 |
| G | R-HSA-2132295 | MHC class II antigen presentation                      | -1.48 | 7.79E-02 |
| H | R-HSA-2132295 | MHC class II antigen presentation                      | 1.39  | 7.93E-02 |
| I | R-HSA-2132295 | MHC class II antigen presentation                      | 2.01  | 2.10E-04 |
| J | R-HSA-2132295 | MHC class II antigen presentation                      | -1.42 | 8.25E-02 |
| K | R-HSA-2132295 | MHC class II antigen presentation                      | -0.64 | 9.21E-01 |
| L | R-HSA-2132295 | MHC class II antigen presentation                      | -2.70 | 3.55E-08 |
| A | R-HSA-1236975 | Antigen processing-Cross presentation                  | 2.29  | 1.52E-06 |
| B | R-HSA-1236975 | Antigen processing-Cross presentation                  | 2.01  | 3.10E-05 |
| C | R-HSA-1236975 | Antigen processing-Cross presentation                  | 2.26  | 1.78E-06 |
| D | R-HSA-1236975 | Antigen processing-Cross presentation                  | 2.04  | 6.83E-05 |
| E | R-HSA-1236975 | Antigen processing-Cross presentation                  | 0.82  | 7.74E-01 |
| F | R-HSA-1236975 | Antigen processing-Cross presentation                  | -0.90 | 5.96E-01 |

|   |               |                                       |       |          |
|---|---------------|---------------------------------------|-------|----------|
| G | R-HSA-1236975 | Antigen processing-Cross presentation | -1.69 | 1.34E-02 |
| H | R-HSA-1236975 | Antigen processing-Cross presentation | 0.68  | 9.26E-01 |
| I | R-HSA-1236975 | Antigen processing-Cross presentation | 2.46  | 4.09E-09 |
| J | R-HSA-1236975 | Antigen processing-Cross presentation | -2.09 | 2.19E-05 |
| K | R-HSA-1236975 | Antigen processing-Cross presentation | -1.13 | 2.93E-01 |
| L | R-HSA-1236975 | Antigen processing-Cross presentation | -1.84 | 2.37E-03 |
| A | R-HSA-202403  | TCR signaling                         | 2.14  | 2.27E-05 |
| B | R-HSA-202403  | TCR signaling                         | 1.41  | 6.37E-02 |
| C | R-HSA-202403  | TCR signaling                         | 1.47  | 2.52E-02 |
| D | R-HSA-202403  | TCR signaling                         | 1.96  | 2.48E-04 |
| E | R-HSA-202403  | TCR signaling                         | 0.95  | 5.42E-01 |
| F | R-HSA-202403  | TCR signaling                         | 1.07  | 3.23E-01 |
| G | R-HSA-202403  | TCR signaling                         | -1.40 | 8.95E-02 |
| H | R-HSA-202403  | TCR signaling                         | -1.58 | 7.34E-03 |
| I | R-HSA-202403  | TCR signaling                         | 1.39  | 7.97E-02 |
| J | R-HSA-202403  | TCR signaling                         | -1.19 | 1.99E-01 |
| K | R-HSA-202403  | TCR signaling                         | -1.37 | 8.65E-02 |
| L | R-HSA-202403  | TCR signaling                         | -1.94 | 4.36E-04 |
| A | R-HSA-380108  | Chemokine receptors bind chemokines   | 1.48  | 6.03E-02 |
| B | R-HSA-380108  | Chemokine receptors bind chemokines   | 1.54  | 3.76E-02 |
| C | R-HSA-380108  | Chemokine receptors bind chemokines   | 1.35  | 9.41E-02 |
| D | R-HSA-380108  | Chemokine receptors bind chemokines   | 1.53  | 1.87E-02 |
| E | R-HSA-380108  | Chemokine receptors bind chemokines   | 2.16  | 7.14E-06 |
| F | R-HSA-380108  | Chemokine receptors bind chemokines   | 1.31  | 1.34E-01 |
| G | R-HSA-380108  | Chemokine receptors bind chemokines   | 1.94  | 1.21E-03 |
| H | R-HSA-380108  | Chemokine receptors bind chemokines   | 0.98  | 4.93E-01 |
| I | R-HSA-380108  | Chemokine receptors bind chemokines   | 0.99  | 4.75E-01 |
| J | R-HSA-380108  | Chemokine receptors bind chemokines   | 0.92  | 5.49E-01 |
| K | R-HSA-380108  | Chemokine receptors bind chemokines   | -1.98 | 1.35E-04 |
| L | R-HSA-380108  | Chemokine receptors bind chemokines   | -1.32 | 1.18E-01 |
| A | R-HSA-1474244 | Extracellular matrix organization     | 1.00  | 4.82E-01 |
| B | R-HSA-1474244 | Extracellular matrix organization     | 1.43  | 4.74E-02 |
| C | R-HSA-1474244 | Extracellular matrix organization     | -1.03 | 3.91E-01 |
| D | R-HSA-1474244 | Extracellular matrix organization     | 1.26  | 9.63E-02 |
| E | R-HSA-1474244 | Extracellular matrix organization     | -2.46 | 1.02E-10 |
| F | R-HSA-1474244 | Extracellular matrix organization     | -0.94 | 5.61E-01 |
| G | R-HSA-1474244 | Extracellular matrix organization     | -2.27 | 3.01E-08 |
| H | R-HSA-1474244 | Extracellular matrix organization     | 1.56  | 2.86E-03 |
| I | R-HSA-1474244 | Extracellular matrix organization     | 0.96  | 5.56E-01 |
| J | R-HSA-1474244 | Extracellular matrix organization     | 1.04  | 3.86E-01 |
| K | R-HSA-1474244 | Extracellular matrix organization     | 2.87  | 1.03E-12 |
| L | R-HSA-1474244 | Extracellular matrix organization     | -2.05 | 3.73E-05 |

Supplemental Table 4. Top Differentially Expressed Genes Post Treatment within CD45+ Enriched Region Grouped by Baseline PD-L1 Status

| Top 50 Up-Regulated Genes<br>PD-L1 Positive (CD45+) |         |        |    |
|-----------------------------------------------------|---------|--------|----|
| measure                                             | p.value | LOG2FC | n  |
| SERPINA1                                            | 2.5E-08 | 1.87   | 11 |
| CXCL9                                               | 9.6E-08 | 1.56   | 12 |
| C3                                                  | 2.3E-03 | 0.73   | 12 |
| A2M                                                 | 3.5E-04 | 0.71   | 12 |
| SMC1B                                               | 3.5E-02 | 0.70   | 3  |
| APOC2                                               | 7.7E-04 | 0.70   | 11 |
| CTSS                                                | 1.5E-02 | 0.70   | 12 |
| CD244                                               | 1.7E-02 | 0.66   | 3  |
| AMBP                                                | 1.0E-03 | 0.65   | 11 |
| CCL5                                                | 7.2E-04 | 0.59   | 12 |
| CXCR6                                               | 2.8E-02 | 0.56   | 3  |
| HLA-DQA1                                            | 8.4E-03 | 0.56   | 12 |
| CCRL2                                               | 3.8E-02 | 0.54   | 3  |
| KLRK1                                               | 1.9E-04 | 0.53   | 12 |
| HLA-DMA                                             | 2.2E-02 | 0.51   | 12 |
| IGFBP3                                              | 1.0E-03 | 0.50   | 12 |
| B2M                                                 | 1.7E-02 | 0.49   | 12 |
| TRBC1/2                                             | 4.2E-02 | 0.49   | 12 |
| APOB                                                | 5.0E-03 | 0.48   | 11 |
| CD63                                                | 1.9E-02 | 0.48   | 12 |
| NKG7                                                | 5.6E-05 | 0.48   | 12 |
| ADH1A/B/C                                           | 5.3E-03 | 0.48   | 11 |
| GPX1                                                | 2.0E-02 | 0.46   | 12 |
| ADH4                                                | 1.8E-02 | 0.44   | 12 |
| TRDC                                                | 2.8E-05 | 0.44   | 12 |
| ITGAX                                               | 3.4E-02 | 0.44   | 12 |
| GZMA                                                | 2.9E-04 | 0.43   | 12 |
| PTPRC                                               | 4.8E-03 | 0.43   | 12 |
| ITGB2                                               | 2.3E-02 | 0.43   | 12 |
| HLA-E                                               | 4.2E-03 | 0.43   | 12 |
| SGK1                                                | 1.0E-02 | 0.42   | 12 |
| LCP1                                                | 1.5E-02 | 0.41   | 12 |
| TUBB                                                | 8.1E-03 | 0.41   | 12 |
| TARP/TRGC1/2                                        | 1.3E-04 | 0.40   | 12 |
| CD81                                                | 1.1E-02 | 0.39   | 12 |
| HLA-DPA1                                            | 8.9E-03 | 0.39   | 12 |
| TTR                                                 | 1.7E-02 | 0.38   | 12 |
| CCL19                                               | 2.5E-02 | 0.38   | 12 |

| Top 50 Down-Regulated Genes<br>PD-L1 Positive (CD45+) |         |        |    |
|-------------------------------------------------------|---------|--------|----|
| measure                                               | p.value | LOG2FC | n  |
| IL1RAP                                                | 2.9E-02 | -0.77  | 3  |
| IFI6                                                  | 2.2E-03 | -0.63  | 12 |
| C4B                                                   | 4.1E-03 | -0.59  | 12 |
| DSC3                                                  | 3.1E-05 | -0.47  | 12 |
| MX1                                                   | 1.5E-04 | -0.47  | 12 |
| ISG15                                                 | 3.7E-02 | -0.42  | 12 |
| EYA1                                                  | 7.5E-05 | -0.40  | 12 |
| RSAD2                                                 | 1.8E-03 | -0.39  | 12 |
| DSP                                                   | 5.3E-03 | -0.39  | 12 |
| CT45A1                                                | 2.3E-02 | -0.37  | 12 |
| IFIT3                                                 | 1.4E-03 | -0.37  | 12 |
| KRT5                                                  | 2.9E-03 | -0.35  | 12 |
| OLR1                                                  | 4.8E-02 | -0.35  | 12 |
| PHGDH                                                 | 1.6E-03 | -0.35  | 12 |
| OAS3                                                  | 1.0E-02 | -0.32  | 12 |
| LTF                                                   | 1.1E-02 | -0.32  | 12 |
| MYCT1                                                 | 1.7E-03 | -0.31  | 12 |
| PLA2G2A                                               | 1.2E-02 | -0.30  | 12 |
| DKK1                                                  | 3.4E-04 | -0.30  | 9  |
| FGF6                                                  | 1.5E-04 | -0.30  | 9  |
| PTCRA                                                 | 1.6E-02 | -0.28  | 12 |
| OAS2                                                  | 2.4E-03 | -0.27  | 12 |
| CDH3                                                  | 2.3E-02 | -0.27  | 12 |
| CCL13                                                 | 3.5E-03 | -0.26  | 9  |
| FST                                                   | 2.6E-02 | -0.26  | 12 |
| CASP12                                                | 8.0E-03 | -0.26  | 12 |
| REN                                                   | 5.6E-03 | -0.26  | 9  |
| CACNG4                                                | 1.4E-02 | -0.26  | 9  |
| SRD5A2                                                | 3.0E-02 | -0.26  | 12 |
| EIF2AK2                                               | 1.4E-03 | -0.24  | 12 |
| HERC6                                                 | 1.4E-03 | -0.24  | 12 |
| RIN1                                                  | 1.1E-02 | -0.24  | 9  |
| PPP3R2                                                | 1.7E-02 | -0.24  | 12 |
| EFNA5                                                 | 2.8E-03 | -0.24  | 12 |
| MME                                                   | 1.8E-02 | -0.24  | 12 |
| RAD51                                                 | 1.4E-04 | -0.24  | 9  |
| CD79A                                                 | 4.7E-02 | -0.23  | 12 |
| NOG                                                   | 1.2E-03 | -0.23  | 9  |

|        |         |      |    |
|--------|---------|------|----|
| APOA1  | 4.7E-02 | 0.36 | 11 |
| PFKFB3 | 1.1E-03 | 0.36 | 12 |
| ITGAL  | 2.2E-03 | 0.35 | 12 |
| CXCL12 | 1.4E-02 | 0.34 | 12 |
| PIK3CD | 3.4E-04 | 0.33 | 12 |
| IL10RA | 6.9E-03 | 0.33 | 12 |
| CD44   | 2.8E-02 | 0.33 | 12 |
| ZAP70  | 1.4E-02 | 0.33 | 12 |
| NLRC5  | 2.7E-03 | 0.32 | 12 |
| GIMAP4 | 6.2E-03 | 0.32 | 12 |
| CD84   | 2.3E-02 | 0.32 | 12 |
| HLA-F  | 3.6E-02 | 0.32 | 12 |

|         |         |       |    |
|---------|---------|-------|----|
| TNN     | 3.1E-03 | -0.23 | 9  |
| BLK     | 8.5E-03 | -0.23 | 9  |
| EDN1    | 1.3E-02 | -0.22 | 12 |
| CREB3L3 | 4.0E-02 | -0.22 | 12 |
| PDK1    | 3.1E-02 | -0.22 | 12 |
| OAS1    | 2.3E-02 | -0.22 | 12 |
| RET     | 1.6E-02 | -0.21 | 9  |
| SYCP1   | 1.6E-02 | -0.21 | 12 |
| NFIL3   | 2.2E-03 | -0.21 | 12 |
| OASL    | 7.9E-03 | -0.21 | 12 |
| HNF1A   | 3.0E-03 | -0.21 | 9  |
| PRDM1   | 1.2E-02 | -0.21 | 12 |

| Top 50 Up-Regulated Genes<br>PD-L1 Negative (CD45+) |         |        |    |
|-----------------------------------------------------|---------|--------|----|
| measure                                             | p.value | LOG2FC | n  |
| C3                                                  | 1.9E-04 | 1.06   | 12 |
| CLU                                                 | 2.7E-03 | 0.80   | 12 |
| WIF1                                                | 1.1E-03 | 0.77   | 3  |
| ZIC2                                                | 8.4E-03 | 0.57   | 3  |
| CDKN2B                                              | 3.1E-02 | 0.52   | 3  |
| KLRK1                                               | 1.4E-05 | 0.46   | 12 |
| CCL5                                                | 1.0E-02 | 0.44   | 12 |
| SSX1                                                | 2.4E-03 | 0.44   | 12 |
| HLA-B                                               | 6.3E-03 | 0.43   | 12 |
| STAT1                                               | 3.5E-02 | 0.43   | 12 |
| CALML3                                              | 4.6E-02 | 0.38   | 3  |
| CCL19                                               | 1.1E-02 | 0.38   | 12 |
| HLA-F                                               | 1.0E-02 | 0.37   | 12 |
| IL2RB                                               | 1.5E-03 | 0.33   | 12 |
| KRT14                                               | 5.4E-05 | 0.33   | 12 |
| CACNB2                                              | 4.4E-02 | 0.32   | 3  |
| CD8A                                                | 4.4E-04 | 0.32   | 12 |
| CCL13                                               | 5.8E-05 | 0.32   | 9  |
| SH2D1A                                              | 7.7E-05 | 0.31   | 12 |
| CXCL11                                              | 2.4E-03 | 0.31   | 12 |
| CD2                                                 | 1.3E-02 | 0.30   | 12 |
| FASLG                                               | 9.7E-06 | 0.29   | 9  |
| CTSW                                                | 1.0E-03 | 0.28   | 12 |
| OAS2                                                | 6.5E-04 | 0.27   | 12 |
| ITGAL                                               | 7.0E-03 | 0.27   | 12 |
| XCL1/2                                              | 3.0E-04 | 0.26   | 12 |

| Top 50 Down-Regulated Genes<br>PD-L1 Negative (CD45+) |         |        |    |
|-------------------------------------------------------|---------|--------|----|
| measure                                               | p.value | LOG2FC | n  |
| FN1                                                   | 8.3E-05 | -0.70  | 12 |
| COL5A1                                                | 2.1E-07 | -0.69  | 12 |
| TPM1                                                  | 1.1E-07 | -0.66  | 12 |
| CALML5                                                | 1.2E-05 | -0.56  | 11 |
| IGFBP3                                                | 1.9E-05 | -0.55  | 12 |
| IER3                                                  | 1.5E-08 | -0.52  | 12 |
| COL3A1                                                | 2.3E-03 | -0.49  | 12 |
| MCAM                                                  | 5.8E-09 | -0.48  | 12 |
| COL5A2                                                | 7.1E-05 | -0.47  | 12 |
| COL11A1                                               | 6.4E-06 | -0.47  | 12 |
| THBS1                                                 | 2.5E-04 | -0.47  | 12 |
| MMP1                                                  | 1.9E-06 | -0.46  | 12 |
| CSF1R                                                 | 9.8E-03 | -0.46  | 12 |
| COL1A1                                                | 7.7E-03 | -0.43  | 12 |
| MMP9                                                  | 4.3E-02 | -0.42  | 12 |
| PLAUR                                                 | 3.2E-06 | -0.41  | 12 |
| FLNA                                                  | 2.3E-05 | -0.40  | 12 |
| ACTA2                                                 | 6.0E-04 | -0.39  | 12 |
| OLFML2B                                               | 5.6E-09 | -0.39  | 12 |
| THY1                                                  | 1.2E-04 | -0.39  | 12 |
| LRP1                                                  | 4.3E-03 | -0.35  | 12 |
| ENG                                                   | 9.3E-04 | -0.35  | 12 |
| FLNB                                                  | 2.4E-05 | -0.34  | 12 |
| INHBA                                                 | 1.9E-05 | -0.33  | 12 |
| PDCD1LG2                                              | 1.8E-02 | -0.33  | 3  |
| NRP1                                                  | 7.8E-05 | -0.33  | 12 |

|        |         |      |    |
|--------|---------|------|----|
| GZMA   | 7.8E-03 | 0.26 | 12 |
| NKG7   | 1.2E-02 | 0.26 | 12 |
| IFIT3  | 3.8E-02 | 0.26 | 12 |
| FGFR2  | 6.0E-03 | 0.26 | 12 |
| GZMK   | 4.5E-03 | 0.26 | 12 |
| EGR2   | 5.1E-04 | 0.25 | 12 |
| PRF1   | 1.2E-03 | 0.25 | 12 |
| EOMES  | 2.9E-03 | 0.25 | 12 |
| SFRP1  | 5.2E-03 | 0.24 | 12 |
| GNLY   | 4.7E-02 | 0.24 | 12 |
| LTF    | 3.7E-02 | 0.24 | 12 |
| SELL   | 2.2E-02 | 0.24 | 11 |
| IDO1   | 4.4E-02 | 0.23 | 12 |
| KLRG1  | 4.5E-03 | 0.23 | 12 |
| GPT    | 8.1E-03 | 0.22 | 12 |
| IL11RA | 1.1E-04 | 0.22 | 12 |
| IL2RG  | 3.3E-02 | 0.22 | 12 |
| HERC6  | 1.4E-03 | 0.21 | 12 |
| GIMAP4 | 3.2E-02 | 0.21 | 12 |
| FGFR4  | 2.5E-02 | 0.21 | 12 |
| CD3D   | 2.9E-02 | 0.21 | 12 |
| ZAP70  | 4.1E-02 | 0.21 | 12 |
| RORA   | 4.9E-03 | 0.21 | 12 |
| CD38   | 2.2E-03 | 0.21 | 12 |

|        |         |       |    |
|--------|---------|-------|----|
| ITGA5  | 1.3E-06 | -0.33 | 12 |
| NOTCH3 | 2.8E-05 | -0.33 | 12 |
| CST2   | 8.4E-04 | -0.32 | 9  |
| KRT7   | 2.2E-03 | -0.32 | 12 |
| TPM4   | 2.2E-04 | -0.32 | 12 |
| VEGFA  | 6.1E-04 | -0.32 | 12 |
| ACTB   | 3.9E-04 | -0.32 | 12 |
| VCAN   | 3.6E-03 | -0.32 | 12 |
| S100A9 | 1.9E-02 | -0.31 | 12 |
| ITGAV  | 3.2E-05 | -0.31 | 12 |
| PLAU   | 2.9E-03 | -0.31 | 12 |
| PDGFRB | 2.9E-04 | -0.30 | 12 |
| FPR3   | 3.3E-02 | -0.29 | 12 |
| RHOB   | 3.2E-02 | -0.29 | 12 |
| ANLN   | 2.3E-04 | -0.28 | 12 |
| C5AR1  | 1.4E-02 | -0.28 | 9  |
| ITGB1  | 2.8E-03 | -0.27 | 12 |
| HSPB1  | 7.0E-03 | -0.27 | 12 |
| LAIR1  | 1.9E-02 | -0.27 | 12 |
| MMP3   | 1.9E-03 | -0.27 | 9  |
| IFITM2 | 5.0E-03 | -0.26 | 12 |
| UBE2C  | 6.1E-03 | -0.26 | 12 |
| H3C10  | 4.4E-02 | -0.26 | 12 |
| JUNB   | 4.5E-03 | -0.26 | 12 |

Supplemental Table 5. Differential Gene Expression at Baseline within CD45+ Enriched Region Grouped by Baseline PD-L1 Status

| Top 50 Genes Associated with Baseline PD-L1 Negative (CD45+ Region) |          |        |            |
|---------------------------------------------------------------------|----------|--------|------------|
| measure                                                             | p.value  | LOG2FC | n patients |
| COL1A1                                                              | 1.52E-06 | -2.29  | 12         |
| COL1A2                                                              | 1.19E-03 | -2.22  | 12         |
| COL3A1                                                              | 5.17E-06 | -2.14  | 12         |
| COL6A3                                                              | 9.25E-03 | -1.94  | 12         |
| SFRP2                                                               | 6.43E-03 | -1.79  | 12         |
| COL5A2                                                              | 3.22E-04 | -1.48  | 12         |
| COL5A1                                                              | 1.01E-04 | -1.43  | 12         |
| VCAN                                                                | 2.83E-03 | -1.29  | 12         |
| FN1                                                                 | 2.06E-02 | -1.16  | 12         |
| SFRP4                                                               | 2.89E-03 | -1.13  | 12         |
| TPM4                                                                | 1.15E-02 | -0.93  | 12         |

| Top 50 Genes Associated with Baseline PD-L1 Positive (CD45+ Region) |          |        |            |
|---------------------------------------------------------------------|----------|--------|------------|
| measure                                                             | p.value  | LOG2FC | n patients |
| C4B                                                                 | 6.47E-03 | 1.95   | 12         |
| CRP                                                                 | 1.40E-02 | 1.18   | 12         |
| LBP                                                                 | 3.53E-02 | 1.11   | 12         |
| IFI6                                                                | 4.64E-02 | 1.04   | 12         |
| C8B                                                                 | 4.52E-03 | 1.01   | 12         |
| PCK1                                                                | 1.43E-02 | 0.97   | 12         |
| MX1                                                                 | 2.43E-02 | 0.86   | 12         |
| IFIT3                                                               | 1.50E-03 | 0.85   | 12         |
| ARG1                                                                | 8.53E-03 | 0.83   | 12         |
| C9                                                                  | 2.20E-02 | 0.81   | 12         |
| MASP2                                                               | 3.33E-02 | 0.72   | 12         |

|          |          |       |    |
|----------|----------|-------|----|
| PKM      | 1.59E-02 | -0.89 | 12 |
| THY1     | 1.03E-03 | -0.85 | 12 |
| ALDOA    | 4.06E-02 | -0.82 | 12 |
| CD9      | 2.39E-02 | -0.82 | 12 |
| FLNA     | 1.73E-02 | -0.82 | 12 |
| CD44     | 3.40E-02 | -0.80 | 12 |
| SERPINH1 | 3.10E-04 | -0.78 | 12 |
| COL11A1  | 7.35E-03 | -0.77 | 12 |
| COMP     | 4.41E-02 | -0.77 | 12 |
| TPM1     | 1.82E-02 | -0.74 | 12 |
| ANXA1    | 1.34E-02 | -0.73 | 12 |
| PLAU     | 1.48E-03 | -0.68 | 12 |
| THBS1    | 9.51E-03 | -0.67 | 12 |
| PDGFRB   | 2.26E-04 | -0.67 | 12 |
| KRT7     | 8.44E-03 | -0.64 | 12 |
| CD99     | 1.60E-02 | -0.62 | 12 |
| LRP1     | 4.38E-02 | -0.60 | 12 |
| IER3     | 5.48E-03 | -0.59 | 12 |
| CSF1R    | 2.14E-02 | -0.59 | 12 |
| COLEC12  | 6.64E-03 | -0.59 | 12 |
| OLFML2B  | 1.44E-03 | -0.58 | 12 |
| RUNX1    | 3.07E-03 | -0.58 | 12 |
| CTNNB1   | 4.16E-02 | -0.57 | 12 |
| PLAUR    | 4.62E-04 | -0.57 | 12 |
| FAP      | 2.93E-03 | -0.56 | 12 |
| FGFR1    | 7.72E-03 | -0.55 | 12 |
| GAS1     | 6.32E-03 | -0.52 | 12 |
| ACTA2    | 3.46E-02 | -0.51 | 12 |
| NOTCH3   | 1.67E-02 | -0.51 | 12 |
| FZD1     | 4.33E-03 | -0.50 | 12 |
| ITGAV    | 2.16E-03 | -0.50 | 12 |
| DAB2     | 1.79E-03 | -0.48 | 12 |
| ITGA5    | 9.24E-04 | -0.46 | 12 |
| CD55     | 2.58E-02 | -0.46 | 12 |
| SBNO2    | 4.40E-03 | -0.43 | 12 |
| PFKFB3   | 3.96E-06 | -0.41 | 12 |
| INHBA    | 4.81E-02 | -0.40 | 12 |
| CAPN2    | 8.61E-03 | -0.40 | 12 |
| IFNGR2   | 3.52E-02 | -0.39 | 12 |

|            |          |      |    |
|------------|----------|------|----|
| CYP4A11/22 | 1.16E-02 | 0.70 | 12 |
| ADH6       | 2.89E-02 | 0.70 | 12 |
| GBP1       | 5.89E-03 | 0.67 | 12 |
| C8A        | 1.28E-02 | 0.66 | 12 |
| GBP4       | 3.85E-03 | 0.66 | 12 |
| HSD11B1    | 6.26E-03 | 0.65 | 12 |
| TDO2       | 3.06E-02 | 0.65 | 12 |
| APOL6      | 2.69E-02 | 0.65 | 12 |
| LEPR       | 3.54E-02 | 0.65 | 12 |
| CYP8B1     | 4.79E-02 | 0.61 | 12 |
| CFI        | 1.99E-02 | 0.61 | 12 |
| F12        | 3.15E-02 | 0.60 | 12 |
| IFIT2      | 2.10E-03 | 0.60 | 12 |
| OAS1       | 1.99E-02 | 0.59 | 12 |
| C6         | 2.11E-02 | 0.59 | 12 |
| RORC       | 1.82E-02 | 0.57 | 12 |
| SRD5A2     | 5.00E-02 | 0.57 | 12 |
| LTF        | 8.91E-03 | 0.56 | 12 |
| CCL21      | 6.93E-03 | 0.56 | 11 |
| C5         | 4.27E-02 | 0.51 | 12 |
| OAS2       | 1.62E-02 | 0.51 | 12 |
| CREB3L3    | 2.24E-02 | 0.50 | 12 |
| IFIH1      | 4.50E-03 | 0.49 | 12 |
| CXCL11     | 1.37E-02 | 0.49 | 12 |
| IDO1       | 3.28E-02 | 0.49 | 12 |
| RSAD2      | 3.67E-04 | 0.46 | 12 |
| ST6GAL1    | 1.41E-03 | 0.46 | 12 |
| HERC6      | 2.28E-02 | 0.45 | 12 |
| HHEX       | 9.36E-03 | 0.45 | 12 |
| ASL        | 2.52E-02 | 0.44 | 12 |
| CCL13      | 3.08E-02 | 0.44 | 9  |
| PCK2       | 3.26E-02 | 0.43 | 12 |
| MGMT       | 3.04E-02 | 0.43 | 12 |
| PHGDH      | 4.71E-03 | 0.43 | 12 |
| PARP9      | 9.80E-03 | 0.43 | 12 |
| PSAT1      | 3.66E-02 | 0.40 | 12 |
| IFI35      | 2.65E-03 | 0.38 | 12 |
| PSMB8      | 4.66E-02 | 0.38 | 12 |
| FSTL3      | 3.69E-02 | 0.37 | 12 |

Supplemental Table 6. Top Differentially Expressed Genes Post Treatment within CD68+ Enriched Region

| Up-regulated genes (CD68+ Region) |         |        |            |
|-----------------------------------|---------|--------|------------|
| measure                           | p.value | LOG2FC | n patients |
| CLU                               | 4.4E-02 | 1.25   | 11         |
| KLRK1                             | 2.5E-02 | 0.37   | 12         |
| SGK1                              | 1.6E-02 | 0.35   | 12         |
| CFD                               | 5.0E-02 | 0.34   | 12         |
| NKG7                              | 1.2E-02 | 0.34   | 12         |
| ITGAL                             | 5.6E-03 | 0.31   | 12         |
| IL2RB                             | 1.5E-02 | 0.25   | 12         |
| PIK3CD                            | 2.5E-02 | 0.24   | 12         |
| GZMA                              | 3.5E-02 | 0.24   | 12         |
| CD38                              | 2.9E-02 | 0.22   | 12         |
| TMEM140                           | 9.4E-03 | 0.21   | 12         |
| TARP/TRGC1/2                      | 3.4E-02 | 0.21   | 12         |
| G6PD                              | 3.2E-02 | 0.20   | 12         |
| CD59                              | 4.7E-02 | 0.18   | 12         |
| ATG7                              | 1.1E-02 | 0.17   | 12         |
| FZD7                              | 4.0E-02 | 0.17   | 12         |
| NR3C1                             | 1.2E-02 | 0.14   | 12         |
| REL                               | 4.1E-02 | 0.13   | 11         |
| UBA7                              | 4.7E-02 | 0.10   | 12         |

| Down-regulated genes (CD68+ Region) |         |        |            |
|-------------------------------------|---------|--------|------------|
| measure                             | p.value | LOG2FC | n patients |
| PLAUR                               | 1.7E-02 | -0.54  | 12         |
| SLC11A1                             | 3.4E-02 | -0.53  | 12         |
| ITGA5                               | 2.3E-02 | -0.43  | 12         |
| MERTK                               | 2.6E-02 | -0.38  | 12         |
| COL11A1                             | 2.0E-02 | -0.32  | 11         |
| FLNB                                | 1.1E-02 | -0.30  | 12         |
| NRP1                                | 3.9E-02 | -0.30  | 12         |
| THBD                                | 2.4E-02 | -0.29  | 12         |
| HIF1A                               | 1.3E-02 | -0.28  | 11         |
| CKLF                                | 2.2E-02 | -0.28  | 12         |
| PLAU                                | 4.0E-02 | -0.27  | 11         |
| TNFAIP6                             | 3.7E-02 | -0.27  | 12         |
| MCAM                                | 2.4E-02 | -0.26  | 12         |
| BCAT1                               | 1.5E-02 | -0.21  | 12         |
| PLAT                                | 1.1E-02 | -0.20  | 12         |
| EIF4EBP1                            | 3.8E-02 | -0.17  | 12         |
| MAPKAPK2                            | 2.3E-02 | -0.15  | 12         |
| KMT2C                               | 1.9E-02 | -0.09  | 12         |

Supplemental Table 7. Individual Patient Pathway Analysis Post Treatment within CD68+ Enriched Region

| Patient ID | Reactome Pathway ID | Description                                            | NES   | pvalue   |
|------------|---------------------|--------------------------------------------------------|-------|----------|
| A          | R-HSA-1236975       | Antigen processing-Cross presentation                  | 2.24  | 3.32E-07 |
| B          | R-HSA-1236975       | Antigen processing-Cross presentation                  | 1.42  | 3.61E-02 |
| C          | R-HSA-1236975       | Antigen processing-Cross presentation                  | 1.92  | 6.19E-04 |
| D          | R-HSA-1236975       | Antigen processing-Cross presentation                  | 2.05  | 9.36E-05 |
| E          | R-HSA-1236975       | Antigen processing-Cross presentation                  | -1.39 | 7.17E-02 |
| F          | R-HSA-1236975       | Antigen processing-Cross presentation                  | 0.87  | 7.24E-01 |
| G          | R-HSA-1236975       | Antigen processing-Cross presentation                  | -1.61 | 3.76E-02 |
| H          | R-HSA-1236975       | Antigen processing-Cross presentation                  | -1.38 | 3.05E-02 |
| I          | R-HSA-1236975       | Antigen processing-Cross presentation                  | 2.53  | 7.51E-10 |
| J          | R-HSA-1236975       | Antigen processing-Cross presentation                  | -2.67 | 2.43E-08 |
| K          | R-HSA-1236975       | Antigen processing-Cross presentation                  | 1.84  | 9.26E-03 |
| L          | R-HSA-1236975       | Antigen processing-Cross presentation                  | -1.90 | 8.57E-04 |
| A          | R-HSA-983169        | Class I MHC mediated antigen processing & presentation | 2.12  | 1.80E-06 |
| B          | R-HSA-983169        | Class I MHC mediated antigen processing & presentation | 1.34  | 7.48E-02 |

|   |               |                                                        |       |          |
|---|---------------|--------------------------------------------------------|-------|----------|
| C | R-HSA-983169  | Class I MHC mediated antigen processing & presentation | 1.81  | 5.66E-04 |
| D | R-HSA-983169  | Class I MHC mediated antigen processing & presentation | 1.83  | 7.24E-04 |
| E | R-HSA-983169  | Class I MHC mediated antigen processing & presentation | -1.13 | 2.45E-01 |
| F | R-HSA-983169  | Class I MHC mediated antigen processing & presentation | 0.62  | 9.92E-01 |
| G | R-HSA-983169  | Class I MHC mediated antigen processing & presentation | -1.46 | 6.53E-02 |
| H | R-HSA-983169  | Class I MHC mediated antigen processing & presentation | -1.03 | 2.58E-01 |
| I | R-HSA-983169  | Class I MHC mediated antigen processing & presentation | 2.33  | 1.82E-08 |
| J | R-HSA-983169  | Class I MHC mediated antigen processing & presentation | -2.26 | 8.02E-06 |
| K | R-HSA-983169  | Class I MHC mediated antigen processing & presentation | 1.37  | 8.70E-02 |
| L | R-HSA-983169  | Class I MHC mediated antigen processing & presentation | -1.81 | 9.65E-04 |
| A | R-HSA-1236974 | ER-Phagosome pathway                                   | 2.20  | 4.13E-07 |
| B | R-HSA-1236974 | ER-Phagosome pathway                                   | 1.44  | 4.39E-02 |
| C | R-HSA-1236974 | ER-Phagosome pathway                                   | 1.79  | 4.45E-03 |
| D | R-HSA-1236974 | ER-Phagosome pathway                                   | 2.05  | 3.29E-04 |
| E | R-HSA-1236974 | ER-Phagosome pathway                                   | -0.96 | 5.10E-01 |
| F | R-HSA-1236974 | ER-Phagosome pathway                                   | -0.61 | 9.52E-01 |
| G | R-HSA-1236974 | ER-Phagosome pathway                                   | -1.57 | 5.25E-02 |
| H | R-HSA-1236974 | ER-Phagosome pathway                                   | -1.32 | 4.95E-02 |
| I | R-HSA-1236974 | ER-Phagosome pathway                                   | 2.37  | 2.48E-07 |
| J | R-HSA-1236974 | ER-Phagosome pathway                                   | -2.22 | 7.10E-05 |
| K | R-HSA-1236974 | ER-Phagosome pathway                                   | 1.64  | 4.87E-02 |
| L | R-HSA-1236974 | ER-Phagosome pathway                                   | -2.18 | 1.39E-05 |
| A | R-HSA-1474244 | Extracellular matrix organization                      | 0.99  | 5.04E-01 |
| B | R-HSA-1474244 | Extracellular matrix organization                      | -1.58 | 2.17E-03 |
| C | R-HSA-1474244 | Extracellular matrix organization                      | -1.24 | 1.31E-01 |
| D | R-HSA-1474244 | Extracellular matrix organization                      | -0.92 | 6.13E-01 |
| E | R-HSA-1474244 | Extracellular matrix organization                      | -2.17 | 1.84E-07 |
| F | R-HSA-1474244 | Extracellular matrix organization                      | -1.27 | 1.31E-01 |
| G | R-HSA-1474244 | Extracellular matrix organization                      | -2.43 | 1.60E-10 |
| H | R-HSA-1474244 | Extracellular matrix organization                      | 1.28  | 7.15E-02 |
| I | R-HSA-1474244 | Extracellular matrix organization                      | 1.29  | 9.86E-02 |
| J | R-HSA-1474244 | Extracellular matrix organization                      | -1.84 | 3.26E-04 |
| K | R-HSA-1474244 | Extracellular matrix organization                      | 2.64  | 8.14E-10 |
| L | R-HSA-1474244 | Extracellular matrix organization                      | 1.40  | 5.63E-02 |
| A | R-HSA-877300  | Interferon gamma signaling                             | 2.35  | 7.31E-09 |
| B | R-HSA-877300  | Interferon gamma signaling                             | 1.26  | 1.43E-01 |
| C | R-HSA-877300  | Interferon gamma signaling                             | 2.46  | 8.20E-08 |
| D | R-HSA-877300  | Interferon gamma signaling                             | 2.66  | 6.25E-10 |
| E | R-HSA-877300  | Interferon gamma signaling                             | -0.84 | 7.21E-01 |
| F | R-HSA-877300  | Interferon gamma signaling                             | 1.07  | 3.27E-01 |
| G | R-HSA-877300  | Interferon gamma signaling                             | -1.68 | 1.86E-02 |
| H | R-HSA-877300  | Interferon gamma signaling                             | -1.89 | 1.40E-04 |
| I | R-HSA-877300  | Interferon gamma signaling                             | 2.35  | 1.06E-07 |
| J | R-HSA-877300  | Interferon gamma signaling                             | -3.31 | 1.14E-13 |
| K | R-HSA-877300  | Interferon gamma signaling                             | -1.05 | 3.67E-01 |
| L | R-HSA-877300  | Interferon gamma signaling                             | -1.86 | 1.09E-03 |
| A | R-HSA-913531  | Interferon Signaling                                   | 2.25  | 5.57E-08 |
| B | R-HSA-913531  | Interferon Signaling                                   | 1.16  | 2.32E-01 |
| C | R-HSA-913531  | Interferon Signaling                                   | 2.17  | 8.77E-07 |
| D | R-HSA-913531  | Interferon Signaling                                   | 3.11  | 1.44E-18 |



|   |               |                                            |       |          |
|---|---------------|--------------------------------------------|-------|----------|
| E | R-HSA-913531  | Interferon Signaling                       | -1.16 | 2.02E-01 |
| F | R-HSA-913531  | Interferon Signaling                       | -0.79 | 8.16E-01 |
| G | R-HSA-913531  | Interferon Signaling                       | -1.46 | 5.93E-02 |
| H | R-HSA-913531  | Interferon Signaling                       | -1.58 | 4.08E-04 |
| I | R-HSA-913531  | Interferon Signaling                       | 2.03  | 1.05E-05 |
| J | R-HSA-913531  | Interferon Signaling                       | -3.27 | 4.72E-16 |
| K | R-HSA-913531  | Interferon Signaling                       | 1.22  | 1.57E-01 |
| L | R-HSA-913531  | Interferon Signaling                       | -2.45 | 3.59E-10 |
| A | R-HSA-6785807 | Interleukin-4 and Interleukin-13 signaling | 1.12  | 3.19E-01 |
| B | R-HSA-6785807 | Interleukin-4 and Interleukin-13 signaling | 1.01  | 4.70E-01 |
| C | R-HSA-6785807 | Interleukin-4 and Interleukin-13 signaling | -1.17 | 2.05E-01 |
| D | R-HSA-6785807 | Interleukin-4 and Interleukin-13 signaling | -1.54 | 5.71E-03 |
| E | R-HSA-6785807 | Interleukin-4 and Interleukin-13 signaling | -1.61 | 5.33E-03 |
| F | R-HSA-6785807 | Interleukin-4 and Interleukin-13 signaling | -1.17 | 2.30E-01 |
| G | R-HSA-6785807 | Interleukin-4 and Interleukin-13 signaling | -1.86 | 4.15E-04 |
| H | R-HSA-6785807 | Interleukin-4 and Interleukin-13 signaling | 0.98  | 5.50E-01 |
| I | R-HSA-6785807 | Interleukin-4 and Interleukin-13 signaling | 1.31  | 1.02E-01 |
| J | R-HSA-6785807 | Interleukin-4 and Interleukin-13 signaling | -1.85 | 4.65E-04 |
| K | R-HSA-6785807 | Interleukin-4 and Interleukin-13 signaling | 1.52  | 2.46E-02 |
| L | R-HSA-6785807 | Interleukin-4 and Interleukin-13 signaling | -0.76 | 8.79E-01 |
| A | R-HSA-2132295 | MHC class II antigen presentation          | 2.24  | 8.49E-08 |
| B | R-HSA-2132295 | MHC class II antigen presentation          | 1.13  | 3.31E-01 |
| C | R-HSA-2132295 | MHC class II antigen presentation          | 1.84  | 3.57E-03 |
| D | R-HSA-2132295 | MHC class II antigen presentation          | 1.78  | 1.09E-02 |
| E | R-HSA-2132295 | MHC class II antigen presentation          | -1.23 | 2.17E-01 |
| F | R-HSA-2132295 | MHC class II antigen presentation          | 1.85  | 1.49E-03 |
| G | R-HSA-2132295 | MHC class II antigen presentation          | -1.79 | 9.66E-03 |
| H | R-HSA-2132295 | MHC class II antigen presentation          | -1.21 | 2.29E-01 |
| I | R-HSA-2132295 | MHC class II antigen presentation          | 2.19  | 7.76E-06 |
| J | R-HSA-2132295 | MHC class II antigen presentation          | -2.86 | 2.24E-08 |
| K | R-HSA-2132295 | MHC class II antigen presentation          | 1.38  | 1.39E-01 |
| L | R-HSA-2132295 | MHC class II antigen presentation          | -1.50 | 5.71E-02 |
| A | R-HSA-194138  | Signaling by VEGF                          | 1.09  | 3.59E-01 |
| B | R-HSA-194138  | Signaling by VEGF                          | -0.80 | 8.45E-01 |
| C | R-HSA-194138  | Signaling by VEGF                          | -1.38 | 7.84E-02 |
| D | R-HSA-194138  | Signaling by VEGF                          | -0.68 | 9.37E-01 |
| E | R-HSA-194138  | Signaling by VEGF                          | -1.18 | 2.19E-01 |
| F | R-HSA-194138  | Signaling by VEGF                          | -0.44 | 9.97E-01 |
| G | R-HSA-194138  | Signaling by VEGF                          | -1.71 | 7.42E-03 |
| H | R-HSA-194138  | Signaling by VEGF                          | 0.85  | 7.51E-01 |
| I | R-HSA-194138  | Signaling by VEGF                          | 1.34  | 9.21E-02 |
| J | R-HSA-194138  | Signaling by VEGF                          | -0.66 | 9.55E-01 |
| K | R-HSA-194138  | Signaling by VEGF                          | 1.22  | 1.91E-01 |
| L | R-HSA-194138  | Signaling by VEGF                          | -0.96 | 5.28E-01 |

Supplemental Table 8. Individual Patient Analysis of Interferon Gamma Signaling Pathway Genes Post Treatment within CD68+ Enriched Region

| Patient ID | measure | p.value | LOG2FC |
|------------|---------|---------|--------|
|------------|---------|---------|--------|

| Patient ID | measure | p.value | LOG2FC |
|------------|---------|---------|--------|
|------------|---------|---------|--------|

|   |       |          |       |
|---|-------|----------|-------|
| A | B2M   | 3.72E-04 | 2.15  |
| B | B2M   | 2.84E-01 | 0.82  |
| C | B2M   | 7.26E-01 | 0.09  |
| D | B2M   | 3.34E-02 | 1.64  |
| E | B2M   | 9.32E-01 | -0.03 |
| F | B2M   | 4.19E-01 | 0.24  |
| G | B2M   | 4.13E-01 | -0.50 |
| H | B2M   | 4.26E-02 | -0.78 |
| I | B2M   | 6.63E-05 | 1.08  |
| J | B2M   | 4.96E-01 | -0.22 |
| K | B2M   | 8.28E-01 | 0.23  |
| L | B2M   | 1.82E-06 | -3.23 |
| A | GBP1  | 9.93E-03 | 0.56  |
| B | GBP1  | 2.41E-01 | 0.13  |
| C | GBP1  | 5.73E-02 | 0.62  |
| D | GBP1  | 4.30E-02 | 1.18  |
| E | GBP1  | 1.63E-01 | 1.09  |
| F | GBP1  | 4.39E-01 | -0.37 |
| G | GBP1  | 3.33E-02 | 0.35  |
| H | GBP1  | 8.87E-01 | -0.04 |
| I | GBP1  | 1.88E-03 | 0.65  |
| J | GBP1  | 4.36E-03 | -0.46 |
| K | GBP1  | 1.04E-01 | -0.48 |
| L | GBP1  | 4.58E-02 | -1.16 |
| A | GBP2  | 2.03E-01 | 0.06  |
| B | GBP2  | 5.83E-02 | 0.36  |
| C | GBP2  | 8.02E-03 | 0.67  |
| D | GBP2  | 4.31E-02 | 0.47  |
| E | GBP2  | 1.10E-01 | -0.31 |
| F | GBP2  | 4.73E-02 | 0.21  |
| G | GBP2  | 3.75E-01 | -0.06 |
| H | GBP2  | 3.80E-04 | -0.28 |
| I | GBP2  | 3.21E-01 | -0.14 |
| J | GBP2  | 3.48E-01 | 0.06  |
| K | GBP2  | 5.77E-02 | -0.43 |
| L | GBP2  | 3.05E-01 | 0.34  |
| A | HLA-C | 3.22E-05 | 1.32  |
| B | HLA-C | 4.61E-02 | 0.70  |
| C | HLA-C | 7.33E-01 | 0.06  |
| D | HLA-C | 3.63E-02 | 1.46  |
| E | HLA-C | 4.54E-01 | -0.38 |
| F | HLA-C | 1.97E-01 | 0.39  |
| G | HLA-C | 2.53E-01 | -0.60 |
| H | HLA-C | 1.96E-01 | -0.41 |
| I | HLA-C | 1.70E-03 | 0.80  |
| J | HLA-C | 3.18E-02 | -0.66 |
| K | HLA-C | 9.14E-01 | 0.04  |
| L | HLA-C | 1.10E-02 | -0.99 |

|   |         |          |       |
|---|---------|----------|-------|
| A | GBP4    | 5.84E-03 | 0.41  |
| B | GBP4    | 8.27E-01 | -0.03 |
| C | GBP4    | 2.39E-02 | 0.32  |
| D | GBP4    | 3.17E-02 | 0.80  |
| E | GBP4    | 4.20E-01 | 0.30  |
| F | GBP4    | 6.69E-01 | -0.10 |
| G | GBP4    | 1.50E-02 | 0.28  |
| H | GBP4    | 7.06E-01 | -0.08 |
| I | GBP4    | 3.93E-02 | 0.21  |
| J | GBP4    | 8.93E-01 | -0.01 |
| K | GBP4    | 2.09E-01 | -0.23 |
| L | GBP4    | 2.83E-01 | -0.33 |
| A | HLA-A   | 2.81E-04 | 1.33  |
| B | HLA-A   | 8.27E-01 | 0.11  |
| C | HLA-A   | 1.26E-03 | 2.04  |
| D | HLA-A   | 2.22E-02 | 1.49  |
| E | HLA-A   | 6.28E-01 | -0.25 |
| F | HLA-A   | 2.47E-01 | 0.45  |
| G | HLA-A   | 3.04E-02 | -0.84 |
| H | HLA-A   | 2.24E-01 | -0.34 |
| I | HLA-A   | 1.45E-03 | 0.74  |
| J | HLA-A   | 9.49E-02 | -0.42 |
| K | HLA-A   | 4.21E-01 | 0.71  |
| L | HLA-A   | 4.94E-05 | -2.25 |
| A | HLA-B   | 8.91E-05 | 1.62  |
| B | HLA-B   | 1.40E-01 | 1.02  |
| C | HLA-B   | 9.60E-04 | 1.91  |
| D | HLA-B   | 2.38E-02 | 1.51  |
| E | HLA-B   | 8.94E-01 | -0.06 |
| F | HLA-B   | 2.56E-01 | 0.40  |
| G | HLA-B   | 5.15E-02 | -0.94 |
| H | HLA-B   | 1.16E-01 | -0.41 |
| I | HLA-B   | 1.59E-04 | 0.90  |
| J | HLA-B   | 1.70E-02 | -0.83 |
| K | HLA-B   | 4.55E-01 | 0.63  |
| L | HLA-B   | 1.56E-05 | -2.17 |
| A | HLA-DRA | 1.11E-03 | 2.16  |
| B | HLA-DRA | 6.28E-01 | 0.35  |
| C | HLA-DRA | 5.26E-02 | 0.69  |
| D | HLA-DRA | 1.25E-01 | 0.78  |
| E | HLA-DRA | 5.36E-01 | -0.33 |
| F | HLA-DRA | 8.24E-02 | 0.63  |
| G | HLA-DRA | 3.19E-01 | -0.71 |
| H | HLA-DRA | 9.14E-01 | -0.03 |
| I | HLA-DRA | 9.18E-05 | 1.23  |
| J | HLA-DRA | 1.89E-01 | -0.42 |
| K | HLA-DRA | 6.68E-01 | 0.44  |
| L | HLA-DRA | 5.43E-09 | -4.87 |

|   |          |          |       |
|---|----------|----------|-------|
| A | HLA-DPA1 | 1.02E-03 | 1.12  |
| B | HLA-DPA1 | 7.99E-01 | -0.10 |
| C | HLA-DPA1 | 2.35E-01 | 0.33  |
| D | HLA-DPA1 | 2.21E-01 | 0.43  |
| E | HLA-DPA1 | 8.24E-01 | -0.11 |
| F | HLA-DPA1 | 5.17E-02 | 0.52  |
| G | HLA-DPA1 | 2.63E-01 | -0.46 |
| H | HLA-DPA1 | 1.84E-01 | -0.20 |
| I | HLA-DPA1 | 3.50E-03 | 0.46  |
| J | HLA-DPA1 | 3.54E-01 | -0.15 |
| K | HLA-DPA1 | 7.20E-01 | -0.24 |
| L | HLA-DPA1 | 1.17E-03 | -1.29 |
| A | HLA-DQA1 | 2.41E-03 | 1.05  |
| B | HLA-DQA1 | 6.14E-01 | 0.28  |
| C | HLA-DQA1 | 1.65E-01 | -0.24 |
| D | HLA-DQA1 | 6.87E-01 | 0.11  |
| E | HLA-DQA1 | 7.33E-01 | 0.20  |
| F | HLA-DQA1 | 4.78E-02 | 0.71  |
| G | HLA-DQA1 | 7.58E-01 | -0.13 |
| H | HLA-DQA1 | 2.17E-01 | -0.18 |
| I | HLA-DQA1 | 2.47E-03 | 1.05  |
| J | HLA-DQA1 | 1.23E-01 | -0.23 |
| K | HLA-DQA1 | 8.39E-01 | 0.16  |
| L | HLA-DQA1 | 1.15E-05 | -2.80 |
| A | HLA-E    | 6.42E-05 | 1.56  |
| B | HLA-E    | 2.49E-01 | 0.84  |
| C | HLA-E    | 1.09E-02 | 0.73  |
| D | HLA-E    | 7.28E-02 | 1.13  |
| E | HLA-E    | 7.09E-01 | 0.08  |
| F | HLA-E    | 4.62E-01 | 0.15  |
| G | HLA-E    | 3.11E-01 | -0.48 |
| H | HLA-E    | 8.42E-02 | -0.50 |
| I | HLA-E    | 3.95E-04 | 0.73  |
| J | HLA-E    | 2.74E-01 | -0.23 |
| K | HLA-E    | 5.17E-01 | 0.45  |
| L | HLA-E    | 2.96E-07 | -2.36 |
| A | HLA-F    | 9.25E-05 | 1.45  |
| B | HLA-F    | 1.70E-01 | 0.46  |
| C | HLA-F    | 3.55E-03 | 0.97  |
| D | HLA-F    | 1.43E-02 | 1.45  |
| E | HLA-F    | 7.57E-01 | -0.14 |
| F | HLA-F    | 5.47E-01 | 0.20  |
| G | HLA-F    | 9.52E-01 | 0.03  |
| H | HLA-F    | 8.60E-03 | -0.71 |
| I | HLA-F    | 7.51E-03 | 0.71  |
| J | HLA-F    | 1.95E-02 | -0.66 |
| K | HLA-F    | 2.62E-01 | 0.59  |
| L | HLA-F    | 1.18E-05 | -1.90 |

|   |          |          |       |
|---|----------|----------|-------|
| A | HLA-DRB3 | 1.51E-02 | 0.74  |
| B | HLA-DRB3 | 7.52E-01 | 0.21  |
| C | HLA-DRB3 | 6.22E-02 | 0.47  |
| D | HLA-DRB3 | 8.45E-02 | 0.84  |
| E | HLA-DRB3 | 2.85E-01 | -0.51 |
| F | HLA-DRB3 | 3.17E-01 | 0.44  |
| G | HLA-DRB3 | 2.35E-01 | -0.69 |
| H | HLA-DRB3 | 2.54E-01 | 0.54  |
| I | HLA-DRB3 | 2.13E-03 | 0.71  |
| J | HLA-DRB3 | 2.11E-01 | -0.29 |
| K | HLA-DRB3 | 9.63E-01 | -0.04 |
| L | HLA-DRB3 | 3.46E-05 | -1.50 |
| A | HLA-DRB4 | 1.19E-03 | 1.18  |
| B | HLA-DRB4 | 9.97E-01 | 0.00  |
| C | HLA-DRB4 | 2.90E-02 | 0.76  |
| D | HLA-DRB4 | 5.49E-01 | 0.31  |
| E | HLA-DRB4 | 3.93E-01 | -0.44 |
| F | HLA-DRB4 | 1.86E-01 | 0.53  |
| G | HLA-DRB4 | 9.51E-01 | 0.03  |
| H | HLA-DRB4 | 2.39E-01 | 0.52  |
| I | HLA-DRB4 | 6.88E-03 | 0.49  |
| J | HLA-DRB4 | 4.20E-02 | -0.67 |
| K | HLA-DRB4 | 3.90E-01 | 0.57  |
| L | HLA-DRB4 | 8.14E-05 | -2.02 |
| A | IRF2     | 1.01E-01 | 0.11  |
| B | IRF2     | 4.06E-01 | 0.18  |
| C | IRF2     | 8.74E-02 | 0.29  |
| D | IRF2     | 3.76E-01 | 0.30  |
| E | IRF2     | 4.09E-01 | 0.23  |
| F | IRF2     | 3.67E-01 | 0.20  |
| G | IRF2     | 6.00E-02 | 0.20  |
| H | IRF2     | 4.87E-01 | -0.10 |
| I | IRF2     | 3.50E-01 | 0.12  |
| J | IRF2     | 9.63E-01 | -0.01 |
| K | IRF2     | 7.58E-02 | -0.46 |
| L | IRF2     | 2.48E-01 | 0.17  |
| A | IRF7     | 2.40E-02 | 0.41  |
| B | IRF7     | 2.21E-01 | 0.92  |
| C | IRF7     | 2.52E-01 | -0.37 |
| D | IRF7     | 8.13E-02 | 1.15  |
| E | IRF7     | 3.08E-01 | -0.53 |
| F | IRF7     | 1.26E-01 | -0.68 |
| G | IRF7     | 5.30E-01 | -0.14 |
| H | IRF7     | 5.86E-03 | -1.38 |
| I | IRF7     | 8.24E-01 | 0.07  |
| J | IRF7     | 2.04E-01 | -0.30 |
| K | IRF7     | 5.28E-01 | 0.54  |
| L | IRF7     | 6.35E-01 | -0.13 |

|   |      |          |       |
|---|------|----------|-------|
| A | IRF1 | 3.80E-01 | 0.06  |
| B | IRF1 | 3.20E-01 | 0.24  |
| C | IRF1 | 1.39E-01 | 0.32  |
| D | IRF1 | 4.34E-01 | 0.24  |
| E | IRF1 | 4.78E-01 | -0.18 |
| F | IRF1 | 2.46E-01 | 0.26  |
| G | IRF1 | 1.99E-01 | 0.19  |
| H | IRF1 | 3.62E-01 | -0.12 |
| I | IRF1 | 3.48E-01 | -0.07 |
| J | IRF1 | 5.43E-03 | 0.18  |
| K | IRF1 | 1.88E-02 | -0.53 |
| L | IRF1 | 2.82E-01 | 0.35  |
| A | OAS2 | 3.91E-02 | -0.19 |
| B | OAS2 | 5.79E-01 | 0.16  |
| C | OAS2 | 9.16E-01 | -0.02 |
| D | OAS2 | 5.24E-02 | 0.85  |
| E | OAS2 | 1.95E-01 | 0.34  |
| F | OAS2 | 3.99E-01 | -0.27 |
| G | OAS2 | 8.72E-01 | 0.02  |
| H | OAS2 | 3.69E-02 | 0.67  |
| I | OAS2 | 7.08E-01 | -0.05 |
| J | OAS2 | 8.62E-03 | -0.55 |
| K | OAS2 | 2.79E-01 | 0.28  |
| L | OAS2 | 5.20E-01 | -0.16 |
| A | OAS3 | 3.57E-01 | -0.14 |
| B | OAS3 | 5.98E-01 | 0.24  |
| C | OAS3 | 5.81E-01 | 0.28  |
| D | OAS3 | 3.38E-02 | 1.45  |
| E | OAS3 | 4.62E-01 | -0.35 |
| F | OAS3 | 1.79E-01 | -0.52 |
| G | OAS3 | 8.05E-02 | 0.13  |
| H | OAS3 | 2.92E-01 | 0.13  |
| I | OAS3 | 2.78E-01 | -0.15 |
| J | OAS3 | 1.20E-01 | -0.28 |
| K | OAS3 | 5.71E-01 | 0.23  |
| L | OAS3 | 1.25E-01 | -0.44 |
| A | PML  | 1.49E-02 | -0.12 |
| B | PML  | 1.30E-01 | 0.37  |
| C | PML  | 4.60E-02 | 0.29  |
| D | PML  | 7.09E-02 | 0.37  |
| E | PML  | 4.21E-01 | 0.16  |
| F | PML  | 3.70E-01 | 0.31  |
| G | PML  | 6.05E-01 | -0.05 |
| H | PML  | 4.21E-02 | 0.72  |
| I | PML  | 2.36E-03 | -0.29 |
| J | PML  | 6.01E-01 | -0.07 |
| K | PML  | 3.33E-01 | -0.21 |
| L | PML  | 3.65E-01 | 0.17  |

|   |       |          |       |
|---|-------|----------|-------|
| A | IRF9  | 4.17E-01 | 0.05  |
| B | IRF9  | 4.84E-01 | 0.15  |
| C | IRF9  | 1.99E-01 | 0.17  |
| D | IRF9  | 4.87E-02 | 0.46  |
| E | IRF9  | 8.60E-01 | -0.03 |
| F | IRF9  | 5.33E-01 | 0.08  |
| G | IRF9  | 2.79E-01 | 0.13  |
| H | IRF9  | 4.24E-01 | 0.07  |
| I | IRF9  | 6.92E-02 | 0.27  |
| J | IRF9  | 3.43E-01 | -0.12 |
| K | IRF9  | 3.45E-01 | 0.28  |
| L | IRF9  | 7.72E-03 | -0.61 |
| A | SOCS1 | 7.63E-01 | -0.02 |
| B | SOCS1 | 7.59E-02 | 0.37  |
| C | SOCS1 | 8.42E-01 | 0.02  |
| D | SOCS1 | 8.50E-01 | 0.11  |
| E | SOCS1 | 4.49E-01 | -0.32 |
| F | SOCS1 | 3.64E-01 | -0.38 |
| G | SOCS1 | 2.30E-01 | 0.21  |
| H | SOCS1 | 1.50E-01 | 0.22  |
| I | SOCS1 | 9.65E-01 | 0.01  |
| J | SOCS1 | 2.64E-01 | 0.17  |
| K | SOCS1 | 8.17E-02 | -0.53 |
| L | SOCS1 | 2.08E-03 | 1.27  |
| A | SOCS3 | 1.19E-01 | -0.14 |
| B | SOCS3 | 5.52E-02 | 0.74  |
| C | SOCS3 | 1.19E-01 | -0.20 |
| D | SOCS3 | 2.91E-03 | -0.71 |
| E | SOCS3 | 3.25E-03 | 0.75  |
| F | SOCS3 | 8.54E-02 | -0.50 |
| G | SOCS3 | 8.88E-01 | -0.02 |
| H | SOCS3 | 1.78E-01 | 0.24  |
| I | SOCS3 | 3.29E-01 | 0.20  |
| J | SOCS3 | 3.19E-01 | 0.16  |
| K | SOCS3 | 6.73E-02 | -0.52 |
| L | SOCS3 | 2.77E-03 | -0.93 |
| A | STAT1 | 5.80E-04 | 1.57  |
| B | STAT1 | 6.07E-01 | 0.20  |
| C | STAT1 | 5.91E-02 | 1.20  |
| D | STAT1 | 4.12E-02 | 2.05  |
| E | STAT1 | 5.80E-01 | 0.43  |
| F | STAT1 | 8.84E-01 | 0.06  |
| G | STAT1 | 2.60E-01 | 0.48  |
| H | STAT1 | 2.75E-01 | -0.43 |
| I | STAT1 | 9.57E-03 | 0.69  |
| J | STAT1 | 2.36E-02 | -0.56 |
| K | STAT1 | 6.09E-01 | 0.21  |
| L | STAT1 | 1.69E-04 | -2.41 |

|   |        |          |       |
|---|--------|----------|-------|
| A | TRIM21 | 9.02E-02 | -0.12 |
| B | TRIM21 | 9.71E-01 | 0.00  |
| C | TRIM21 | 4.50E-02 | 0.16  |
| D | TRIM21 | 8.71E-01 | 0.04  |
| E | TRIM21 | 3.23E-01 | 0.28  |
| F | TRIM21 | 1.64E-01 | 0.21  |
| G | TRIM21 | 2.79E-01 | 0.10  |
| H | TRIM21 | 1.22E-02 | 0.67  |
| I | TRIM21 | 7.64E-01 | -0.03 |
| J | TRIM21 | 9.33E-03 | 0.18  |
| K | TRIM21 | 2.71E-02 | -0.63 |
| L | TRIM21 | 1.61E-01 | 0.54  |
