# Supplementary material for: Eganelisib combined with immune checkpoint inhibitor therapy and chemotherapy in frontline metastatic triple-negative breast cancer triggers macrophage reprogramming, immune activation and extracellular matrix reorganization in the tumor microenvironment
Source: PubMed Central journal article supplement — J Immunother Cancer. 2024 Aug 30;12(8):e009160. doi: 10.1136/jitc-2024-009160 (PMC11367338; doi:10.1136/jitc-2024-009160), 2024-08-30
Supplement: jitc-12-8-s002.pdf [file jitc-12-8-s002.pdf]

# Eganelisib combined with immune checkpoint inhibitor therapy and chemotherapy in front line metastatic triple negative breast cancer triggers macrophage reprogramming, immune activation and extracellular maxtrix reorganization in the tumor microenvironment

## PD-L1 Agnostic

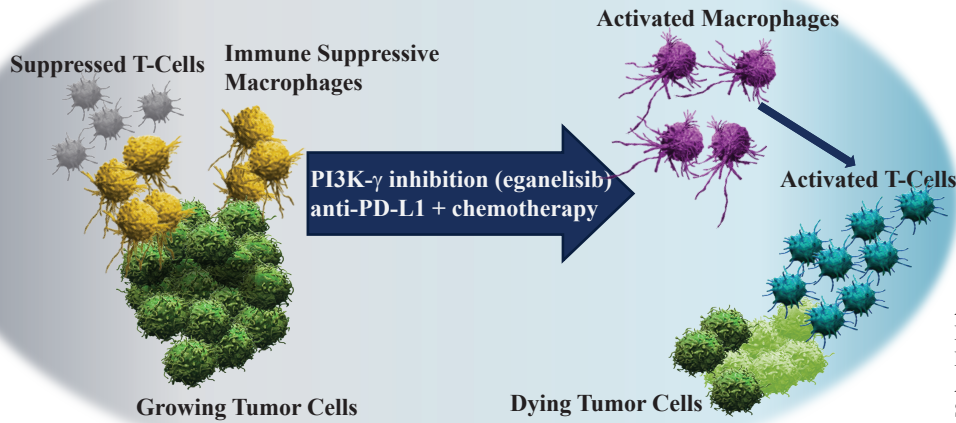

**Authors:** Brenda C O'Connell, Charley Hubbard, Nora Zizlsperger, Donna Fitzgerald, Jeffrey L Kuotk, Judith A Varner, Robert Ilaria, Jr., Melody A Cobleigh, Dejan Juric, Kate HR Tkaczuk, Anthony Elias, Arielle Lee, Shaker Dahkil, Erika Hamilton, Hatem Soliman, Stephane Peluso.

**Correspondence**  
brendaoconnell5@gmail.com

## PD-L1 Negative

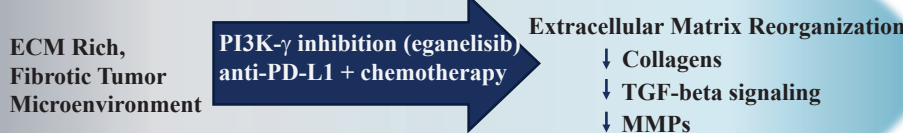

**In Brief**  
Eganelisib combined with immune checkpoint inhibitor therapy and chemotherapy reprograms macrophages and activates an anti-tumor immune response regardless of PD-L1 status and reduces expression of genes involved in extracellular matrix reorganization and fibrosis in PD-L1 negative tumors that are rich in ECM proteins
